# Supplementary material for: Hub Genes Identification in a Murine Model of Allergic Rhinitis Based on Bioinformatics Analysis
Source: Front Genet. 2020 Aug 25;11:970. doi: 10.3389/fgene.2020.00970 (PMC7477359; doi:10.3389/fgene.2020.00970)
Supplement: Supplementary file 3 [file Table_2.XLSX]

## Sheet: 工作表1
Gene	GSM1276474	GSM1276475	GSM1276476	GSM1276477	GSM1276478	GSM1276479
Aass	7.52203	7.22021	7.16995	7.13729	6.72229	6.6881
Acan	5.45596	6.05884	5.4129	6.68323	6.32055	6.72191
Ace	7.24268	7.33255	7.006	8.17186	7.55041	8.14194
Acot10	5.03939	4.9934	5.0661	5.231	5.43952	5.26546
Acot2	7.51462	7.4163	7.65426	6.99699	6.71758	6.82232
Adamdec1	8.09883	7.9512	8.23518	7.64236	7.63971	7.69986
Adhfe1	8.66416	8.71201	8.76721	7.88991	7.90045	8.50825
Adm	4.97009	4.8704	5.02196	5.51866	5.31422	5.57509
Ahcy	7.93472	7.70201	7.73752	7.31459	7.33381	7.45822
Ahsg	6.53193	6.45409	5.89257	5.04141	5.25046	5.38758
Ak1	10.0032	9.89079	10.0962	9.46346	9.67993	9.67993
Ak8	8.83742	8.40906	8.27252	8.1289	7.95817	7.58856
Akr1d1	4.59339	4.59339	4.45934	3.63561	3.61161	3.88247
Alb	5.18523	4.98201	5.11465	3.77661	4.0002	4.11814
Aldob	6.17202	5.82259	5.82787	4.90591	4.60616	4.80922
Alox12e	7.1827	6.76545	5.9062	8.64077	7.77992	8.80288
Angptl7	5.66802	5.58051	5.37986	6.09551	5.85374	6.20939
Anxa1	8.73376	8.33809	7.49266	9.38824	8.95781	9.3829
Aox2	10.8164	11.0169	11.2187	10.5089	10.644	10.2431
Apoc3	5.88826	5.34445	5.44722	4.71163	4.73033	4.63273
Arf4	8.78262	8.6334	8.53225	9.52389	9.22944	9.29922
Arg2	6.21618	6.07209	5.84151	6.84678	6.45427	6.71376
Arhgap40	8.74629	8.6641	8.85263	8.42131	8.32304	8.04568
Arl3	9.17717	8.89547	9.09671	8.67736	8.79767	8.7623
Ascl3	8.46462	8.4193	8.11718	8.1386	7.84978	7.89712
Atf3	6.28422	5.80809	6.08385	6.28422	6.76479	6.62373
Atp8b4	6.02877	5.93344	6.14869	6.86714	6.62453	6.38453
AU021092	7.53431	7.73587	7.87682	7.12681	7.31276	6.87838
B4galnt2	4.80288	4.81687	4.80849	6.6752	6.79008	6.54334
B4galt5	6.56828	6.42558	6.34527	7.12912	7.13959	7.25986
BC094916	3.57673	3.37016	3.20334	3.64999	4.03083	3.81722
Bcl11a	8.58983	8.56692	8.74616	8.23025	8.28439	8.15575
Bcl3	6.86975	6.5808	6.36512	7.77235	8.6126	8.07856
Bet1	5.76176	5.8259	5.73478	6.30209	6.23158	6.23158
Bglap3	8.4303	7.6474	8.12789	9.3238	9.26033	9.28372
Bhlhe40	6.96746	7.32296	7.26108	7.95118	8.20477	8.23338
Birc3	5.97331	5.8814	5.54563	6.65748	6.98227	6.52927
Bpifa2	8.93376	8.34943	8.41503	9.77891	9.09246	10.3169
Bpifb9a	9.8656	11.571	12.1049	5.1214	5.82096	8.21163
Bpifb9b	11.2972	12.1486	12.4149	5.06231	7.4627	9.20206
C1galt1	7.95402	7.778	7.78012	8.86265	8.37603	8.42377
C1qc	6.47795	6.35588	6.00135	7.28154	6.47795	7.37989
Calb2	8.10005	8.33572	8.76369	9.22741	9.44041	9.42621
Camk2n1	7.40742	7.27057	7.09553	7.92138	7.96066	7.98854
Camp	7.67153	7.71863	6.44009	6.00063	6.18661	6.14806
Car11	7.60012	7.86764	7.77936	7.33708	7.33708	7.53869
Car6	10.8868	10.9939	9.84728	11.9102	11.542	11.4657
Casp4	5.57652	5.08123	5.05422	5.83565	6.55788	5.70697
Cbs	7.02582	7.23931	6.99235	6.47399	6.64262	6.57136
Ccdc141	5.524	5.52944	5.7955	5.95169	5.91984	6.14383
Ccdc189	7.75046	7.70267	7.6947	7.25417	7.14152	6.91461
Ccdc60	7.29082	7.28503	7.53005	6.66737	6.98804	6.50952
Ccdc85a	5.53256	5.56636	5.92419	5.99712	6.08804	6.35162
Cck	6.5879	6.31194	5.2855	7.25722	7.12877	7.14801
Ccl20	6.75108	6.39444	6.08299	7.46616	9.80445	9.42009
Ccl3	6.12281	5.85522	5.0132	7.01226	6.64402	7.26259
Ccl8	5.47763	4.56966	4.13891	8.03427	5.35095	8.20122
Ccl9	6.95917	6.6974	7.08296	8.62976	8.06738	8.23985
Ccr1	4.00768	4.36781	3.9632	5.11188	4.46115	4.94231
Cd14	6.60419	6.23883	5.35157	6.97842	7.73264	6.97842
Cd209a	6.04258	5.99665	5.5599	6.40982	6.12207	6.49514
Cd209e	4.74847	4.46485	4.44742	5.04682	4.95043	5.86421
Cd300lf	5.5922	5.5611	5.52339	5.81674	5.86741	5.89678
Cdo1	8.19004	7.72846	7.80914	7.69105	7.29056	7.15733
Cdon	8.46181	8.37091	8.39996	8.10281	8.22974	7.97966
Cebpd	5.42912	5.6117	5.54336	6.13239	6.98872	6.9837
Celf1	6.28309	6.18309	6.46057	6.93399	6.86904	6.74356
Cemip	6.07895	6.22363	6.03454	6.29899	6.6918	6.88756
Cftr	6.26232	6.38031	6.01816	6.87748	6.85386	6.61107
Chia1	6.75814	6.64096	6.35731	6.20559	6.06612	5.55986
Chil1	9.22147	8.08077	7.03018	10.0053	9.98094	9.32148
Cirbp	9.31069	9.26074	9.24126	8.8412	8.72655	8.86686
Cish	5.87325	6.29498	5.89449	6.70117	7.29975	7.01015
Cks2	7.8436	7.89996	7.82159	7.35205	7.31665	7.35205
Clca1	4.69486	5.02853	4.49169	5.91352	5.35438	5.84104
Clca3a1	6.26894	5.89284	5.08487	7.4854	6.38729	7.31895
Clca3a2	7.88192	7.50661	5.59588	9.8075	8.13532	10.0086
Cldn22	5.20192	5.36124	5.07142	5.97122	5.49336	5.73529
Cldn4	7.67486	7.6346	7.4771	8.33624	8.84047	8.56933
Cldn7	8.03234	7.77067	7.60529	8.62884	8.81628	8.69723
Cldn9	8.21806	8.40437	8.4001	7.9005	8.11321	7.86627
Clec3a	5.25425	5.65226	5.32107	6.5125	5.65226	6.8545
Clec4d	4.49219	4.33588	4.50238	5.20286	5.40906	4.63829
Clec5a	5.18101	5.14495	4.75298	5.44367	5.27984	5.59332
Clip4	7.7431	7.94854	7.83246	7.04059	7.63502	7.43767
Cln6	8.73401	8.43138	8.47224	8.24459	8.20494	8.24459
Clpp	8.93957	8.77591	8.78768	8.31205	8.47363	8.55429
Cnpy1	5.69798	5.60452	5.90859	6.23797	6.71612	6.3978
Col10a1	5.88857	6.17667	5.86922	7.6303	7.02881	8.54319
Coq9	8.42675	8.50414	8.49835	8.14076	7.92238	8.19629
Cpb2	4.70584	4.51829	4.32512	3.46367	3.40145	3.40145
Cps1	6.75172	6.36406	5.9461	4.9552	4.61303	4.8153
Csf2rb	6.79073	5.96474	5.93562	7.37828	7.42029	7.56099
Csf2rb2	6.15976	6.04644	5.68236	7.11504	7.38247	7.12006
Csf3r	6.65669	6.27181	5.80123	7.39991	7.25392	7.15429
Ctps	5.55896	5.58174	5.42101	5.94102	6.13612	5.92958
Cxcl1	5.5237	5.41909	5.80639	6.07749	7.51904	6.69375
Cxcl16	6.24588	5.97955	5.93861	7.32924	7.2186	7.38429
Cxcl2	4.60088	4.57946	4.92942	6.07299	8.20567	6.29505
Cxcl5	5.98724	5.25505	5.03188	6.22929	6.26876	6.45246
Cxcr2	6.09799	6.2042	5.45955	7.15744	6.50608	6.52289
Cyba	7.25387	6.88055	6.64025	7.65441	7.41114	7.6901
Cyp2b19	7.09385	7.76216	7.98187	6.07232	6.7806	5.34821
Cyp2e1	7.6927	7.37023	7.72069	7.07063	7.26815	6.52853
Cyp2w1	6.42072	6.46854	5.94071	5.72447	5.81677	5.41334
Cyp3a13	6.94996	6.98287	6.72986	6.56656	6.01021	6.48448
Cyp4a14	5.11469	5.42047	5.11738	3.68393	3.6577	3.76994
Cytl1	6.29664	6.44179	6.07667	9.87821	8.35251	10.3759
D17H6S56E-5	7.18451	6.95045	6.70281	8.11994	8.7717	8.42744
D8Ertd82e	5.61376	5.78173	5.50919	5.82533	6.10105	5.92225
Dbp	8.01467	7.82355	7.752	7.35562	7.57191	7.16887
Dctn3	8.14993	7.95691	7.85919	7.64016	7.77584	7.61882
Ddx3y	4.07712	3.95955	3.63995	7.49892	7.51281	7.24912
Dhdh	8.74494	8.80543	8.9329	8.47977	8.38821	8.34322
Dnajb13	8.60243	8.53269	8.54392	8.14711	8.17494	8.12532
Dnm1	9.27818	9.33491	9.58227	9.07809	9.1585	9.03575
Dok2	5.61695	5.54081	5.61695	5.72904	5.96054	6.05173
Dpy19l3	7.78125	7.85552	7.69369	7.49881	7.18796	7.30171
Dpysl3	8.46581	8.56551	8.41428	9.35216	9.24313	9.04378
Dydc1	7.38888	7.3563	7.44039	6.68655	7.13224	6.96927
Ech1	9.09946	9.13174	9.08403	8.53803	8.68125	8.5724
Efna1	6.13417	6.27628	5.99268	6.31601	6.80059	6.68943
Efna3	10.3411	10.5543	10.65	9.8801	10.1907	10.201
Egln3	7.31503	7.27973	7.10936	8.09969	7.97213	8.32841
Egr2	5.1084	5.1084	4.95852	5.36444	5.64755	5.26936
Ehd3	8.2783	8.56456	8.52822	8.10039	8.07255	8.03056
Eid3	5.16269	5.04608	5.27832	5.74426	6.36184	5.8461
Eif2s3y	3.35044	3.57854	3.00434	8.46565	8.30314	8.07544
Elane	7.87186	7.50938	7.62746	7.31701	7.08762	6.88784
Elf3	7.21355	7.20124	6.68654	8.23499	8.61649	7.79354
Emp1	8.00967	7.96593	7.6048	8.50919	8.75608	8.78168
Ephx1	9.62002	9.80679	9.60328	9.30814	9.14307	9.01147
Ephx4	7.55784	7.31648	7.39269	6.89624	7.08731	7.08731
F2rl1	6.94415	7.10835	6.96998	7.98135	7.80316	7.68497
Fabp1	4.22212	5.09257	3.66059	2.92665	2.93203	3.05689
Fabp5	5.79595	5.36477	5.24998	6.48563	5.87081	6.96415
Fam110c	6.04543	5.85159	5.94238	6.49315	6.35832	6.51201
Fam132a	7.86467	7.8385	7.98145	7.60742	7.55631	7.39623
Fam221a	8.06265	8.02199	7.92033	7.58498	7.61592	7.61338
Fbxl3	8.19594	8.04685	8.1695	7.69385	7.60475	7.6331
Fbxo16	7.50912	7.46202	7.4673	6.95758	7.00483	6.97049
Fbxo31	8.75007	8.52492	8.47131	8.31803	8.23166	7.9741
Fbxo36	9.84989	9.34647	9.36117	9.14442	9.0869	8.82653
Fer1l6	5.8585	6.21845	5.25439	7.30386	6.48991	6.77397
Fgf20	7.14699	7.67083	7.19273	6.64086	6.72514	6.39442
Fgg	4.99971	4.57038	4.45586	3.5553	3.59404	3.54442
Fgl1	5.29472	4.97877	4.87918	3.79571	4.45742	4.35358
Fgl2	5.42248	5.14548	5.33622	6.19005	5.6877	6.12108
Fjx1	5.96345	5.76623	5.65021	6.09205	6.24917	6.09615
Fkbp5	6.04195	5.84392	6.09382	6.68513	6.72402	6.49132
Fmo1	10.1227	9.89634	9.74006	9.20088	9.6313	9.08095
Fndc10	7.54435	7.56397	7.7143	7.35903	7.18078	7.22187
Fos	5.3141	5.14606	5.52428	5.82021	6.26268	5.68216
Fosl2	6.86953	7.10996	6.72487	7.45215	7.90666	7.48124
Frzb	5.02567	5.09949	4.74477	5.61637	5.33701	6.27405
Gabarapl2	4.97834	5.12922	5.18623	5.69349	5.62879	5.51382
Gadd45b	6.97059	6.72885	6.20376	7.49114	8.06014	7.53701
Gadl1	8.92502	9.1133	9.31417	8.44664	8.53636	8.63545
Galc	6.13848	6.07342	5.96491	6.75469	6.37149	6.55609
Gas2l3	5.63377	5.57227	5.52523	5.96164	5.84457	6.22397
Gas5	5.53991	5.41382	5.1502	5.72114	5.96458	5.8384
Gc	6.09956	5.3589	5.54704	4.23609	4.64004	4.24971
Gcnt7	7.43072	7.72054	7.76247	7.10638	7.12427	7.0897
Gdap10	6.17168	5.83941	6.45396	7.36481	6.72834	6.6013
Gk	7.03767	6.70376	6.57423	7.42567	8.03705	7.43574
Gm10081	2.63153	2.75518	2.85639	2.96282	2.94152	3.01868
Gm10522	4.63316	4.66918	4.59987	4.84628	5.06648	4.95203
Gm10639	7.71305	7.51107	7.47444	7.19373	7.38466	7.07903
Gm10673	5.35937	5.35078	5.43876	5.86278	5.65395	5.74903
Gm11478	9.54216	9.42562	9.43437	9.13627	9.1776	8.92761
Gm12359	4.93346	5.08503	5.34343	5.51637	5.75762	5.47143
Gm12474	7.24063	6.94423	7.09186	6.79522	6.75806	6.50172
Gm13033	5.23369	5.31106	5.26229	5.55317	5.46199	5.64324
Gm13363	9.18323	9.23576	9.49851	10.2065	9.98929	9.70196
Gm13769	7.17648	7.32679	7.08723	6.16356	6.6904	6.578
Gm20831	4.19184	4.0881	4.29888	4.79404	5.20074	6.55037
Gm20871	3.40606	3.73443	3.33964	3.98805	4.85783	4.98679
Gm20917	3.01719	3.49013	3.3975	3.72261	4.55959	5.62601
Gm4070	3.62234	3.50244	3.37462	3.71333	3.71333	3.81679
Gm4461	8.87416	9.16237	8.94554	8.39647	8.50344	7.34293
Gm5424	7.68497	7.36737	7.42589	7.10657	7.03318	7.16341
Gm9222	4.98033	4.87539	4.85402	5.12986	5.07217	5.2273
Gm9776	7.14093	6.6994	7.11059	6.27308	6.48396	6.48396
Gmppb	5.45608	5.51132	5.55201	5.98702	5.72231	5.9064
Gng3	4.89151	5.52577	5.69401	6.08391	6.18575	6.25752
Gng8	6.3201	6.09387	6.40734	6.95688	6.96868	7.00115
Gpnmb	5.91917	5.78542	5.55341	6.09238	6.08032	6.22912
Gpr146	5.82015	5.88814	5.53003	6.05173	6.22655	6.27876
Gpr183	5.70975	5.34203	5.0175	5.91094	5.91477	5.79754
Gpx8	7.74564	7.86394	7.54549	7.48804	7.35846	7.32005
Gramd1c	8.11428	8.38751	8.34305	7.60818	7.98475	7.95879
Gstm1	11.0933	11.2124	11.2324	10.7192	10.9861	10.5329
Gstm2	10.2983	10.1463	10.096	9.80454	9.71326	9.66154
Gstm4	8.25934	7.98919	7.87815	7.66162	7.81205	7.45215
Gstm7	8.13175	7.93515	8.12429	7.56501	7.62874	7.597
Gulo	5.69024	5.25143	5.08871	4.59788	4.64531	4.42006
H2-M10.3	5.46181	6.01884	7.12802	8.4605	8.39892	8.63442
H2-M10.6	3.133	3.85666	3.56059	4.42134	4.34874	4.37915
Hcar2	5.43061	5.11304	5.01512	6.03511	6.57584	6.07088
Hdc	6.913	6.67668	6.37958	7.11567	7.62831	7.09769
Hddc3	7.76462	7.70637	7.71001	7.21166	7.33033	7.36825
Hk2	6.57159	6.33917	6.4811	6.96326	7.47328	7.19722
Hmgcs2	8.06237	7.70123	7.84988	7.03426	7.06874	7.4043
Hpx	7.13001	6.78722	6.32965	4.58371	5.02758	4.98154
Hs3st1	6.56366	6.35554	6.37209	7.31888	7.07524	6.93663
Hs6st2	4.51703	4.61135	4.28971	4.90952	4.84106	4.70605
Ier3	5.98363	5.94931	5.83016	6.8784	7.67964	6.85522
Ifi27l2a	7.86489	7.39225	7.59211	6.25201	6.77655	6.43055
Ifngr2	8.70079	8.65716	8.37073	9.23592	9.40775	9.26051
Igha	5.94373	5.78958	5.48486	7.03824	5.92638	6.99446
Ighg3	5.8715	5.52655	5.50905	7.61999	6.66441	7.41882
Ighv1-53	5.23273	4.29596	4.01287	5.79521	5.61048	5.51138
Ighv1-72	4.16146	4.37761	4.12685	5.03691	4.49908	4.57314
Igkv4-59	6.60188	6.4669	6.81243	8.49966	8.07365	6.92851
Igkv5-43	3.14787	2.81216	3.27923	4.67398	3.84223	3.79449
Igkv8-30	4.28301	3.75094	3.87413	4.9251	5.09113	5.2273
Igkv9-120	5.18401	3.26589	3.2115	7.56566	5.91794	5.72471
Il1a	4.11867	4.01126	3.58039	4.90386	5.38335	5.48364
Il1b	6.08712	5.59477	5.29757	7.67578	8.33178	7.54784
Il1r2	5.06465	5.45596	4.65768	5.61045	5.83911	5.94468
Il1rl1	4.71397	4.80854	4.7678	5.5482	5.05768	6.27337
Il1rn	5.78538	5.63269	5.50637	6.20938	6.10776	6.4088
Il33	8.7311	8.91815	8.80141	7.95552	8.38436	7.54743
Il4ra	6.93336	6.89365	6.66029	7.62613	7.29994	8.06453
Ina	6.14199	5.83319	5.99075	6.51137	6.30202	6.39781
Ipo13	9.43403	9.34831	9.61786	9.06488	9.19346	9.19346
Irgm1	6.73383	6.16807	6.13985	6.82243	6.82243	6.88619
Itih3	6.76899	6.41163	6.01871	5.21456	5.38968	5.33054
Ivl	5.3776	5.31423	4.88141	5.88165	5.69118	5.5338
Jchain	6.86521	5.92812	5.12687	8.36695	7.33828	7.50181
Junb	5.79291	6.12695	6.03568	6.37896	6.60231	6.6881
Kcnj5	7.4017	7.65873	7.27309	7.05139	6.61245	6.01991
Kcnk5	6.32199	6.35912	6.41743	7.31074	7.28705	6.96255
Kdm5d	4.91602	4.66748	4.81048	7.08925	6.9805	7.09335
Kdm6a	8.15825	8.37161	8.38567	7.99057	7.67814	7.77441
Keg1	4.91574	4.66226	4.87343	3.80011	4.09732	4.007
Kin	4.80526	5.11495	5.16218	5.52651	5.40775	5.39418
Klf10	6.29596	5.8823	5.87857	6.95245	6.83153	6.91848
Klf5	8.46027	8.19805	7.71538	9.05308	8.84069	8.64487
Krtap31-2	4.41124	4.35399	4.28209	4.72867	4.67448	4.47825
Kxd1	8.39035	8.36233	8.07562	7.85246	7.85383	7.71727
Lage3	8.05599	8.1463	7.77234	7.62033	7.54568	7.45932
Ldlrad3	9.44534	9.65208	9.57319	9.29244	9.25842	9.25531
Lgals12	7.68579	7.34434	7.61534	7.35562	7.13016	7.05845
Lilr4b	6.36871	6.07585	5.70996	7.36382	7.69112	7.52209
Lilra6	5.00758	4.99554	4.72792	5.22588	5.29256	5.24072
Lilrb4a	6.38664	5.92163	5.46873	6.96022	7.32758	7.29987
Lipg	5.3378	5.54672	5.56126	5.84391	6.37423	5.98298
Litaf	7.76602	7.81117	7.68368	8.54757	8.55175	8.93014
LOC101055758	7.74074	7.56775	7.03925	6.86904	7.0232	6.65773
Lrg1	5.96866	5.89528	5.67947	6.1812	6.37824	6.24945
Lrrc6	7.96942	7.97156	7.85508	7.62232	7.58363	7.36658
Lrrc61	8.07916	8.30251	8.42466	7.84489	7.92674	7.85574
Ly6g	8.6078	8.68123	7.09402	7.05437	6.49731	6.10363
Mab21l3	5.24895	5.10921	4.97731	5.75609	6.348	6.35538
Mafb	6.64288	6.70412	6.02184	7.17195	6.9931	7.25222
Maff	5.5949	5.12817	5.18812	5.67715	5.9956	5.86575
Map3k8	6.31275	5.88857	5.72262	6.87651	7.33263	7.29709
Mcoln2	5.41045	5.23354	5.08484	5.73979	5.46483	5.72497
Mcpt1	4.02205	5.08323	3.83279	9.37385	5.98096	9.94652
Mcpt2	4.26081	4.20497	3.73663	8.6622	5.6055	9.28746
Mdk	7.54322	7.32317	7.38948	7.05738	7.19308	6.92319
Mgat4a	7.89466	7.67951	7.37285	8.75959	8.44618	8.44618
Micall2	5.6599	5.27312	5.40301	5.83163	6.18071	5.88913
Mir224	4.45674	4.30343	4.42425	5.11106	4.62766	4.75051
Mir99ahg	4.34892	4.2487	3.92399	4.78678	5.20577	4.80844
Mitd1	6.29015	5.90418	6.01417	6.60578	6.63764	6.40368
Morn2	8.5916	8.58774	8.55663	8.34105	8.21624	8.07635
Mpo	7.65763	7.07712	7.01563	6.81196	6.06288	5.87345
Mrps21	8.53412	8.15202	8.40112	9.23581	9.17895	8.9747
Ms4a6d	5.36253	4.79526	4.49268	6.55971	5.38206	6.96429
Mt3	7.51933	7.55822	7.63495	7.1744	7.06527	7.46907
Muc1	8.94252	8.32363	7.47704	9.56948	9.20627	9.33368
Mug1	6.73109	6.97018	6.56265	6.10383	5.59851	5.61533
Myd88	7.83857	7.24653	7.39127	8.27452	8.56208	8.37924
Nabp1	7.04636	6.95003	6.99404	8.01745	7.79148	7.85168
Nav3	6.87514	7.14791	6.88995	6.27313	6.76982	6.5191
Ncam2	7.8877	8.16167	8.16926	7.30018	7.55932	7.05833
Ndufs4	10.2002	9.86612	9.79196	9.50702	9.48402	9.49472
Necab1	8.4489	8.62545	8.76728	7.39682	8.13915	8.15853
Neurl3	5.77509	6.09272	5.72628	6.3311	6.55123	6.65288
Neurod1	5.16724	4.74768	4.49157	5.34856	5.58046	5.33284
Neurog1	5.22355	5.40834	5.31416	5.49005	5.6504	5.60892
Nfat5	9.22708	9.35149	9.47868	10.4419	10.3177	9.90826
Nfkb2	6.65695	6.93312	6.6201	7.38961	7.7413	7.47005
Nfkbia	8.13222	8.04258	8.04161	8.95565	9.78038	8.83398
Nfkbie	5.67148	5.74473	5.55264	6.20301	6.79087	6.32533
Nhlh1	5.98846	5.8095	6.43746	7.90142	7.86878	7.45176
Nr1d1	9.37239	9.11365	8.85897	8.3388	8.53363	8.41639
Nr2e1	8.20484	8.3193	8.33571	8.01456	7.84661	8.03142
Nr4a1	7.06367	7.45305	8.14664	8.79787	8.77965	8.2354
Nr4a3	5.18401	5.13026	5.22718	5.99266	6.88366	6.01248
Nuak1	7.41411	7.68122	7.3208	7.10008	7.08688	7.17806
Nudt9	8.5314	8.68596	8.52529	8.1318	8.05002	8.31375
Nupr1	9.3736	9.05635	8.99941	10.0216	9.93874	9.8277
Olfr1006	6.07094	6.57358	6.22743	4.87165	5.3584	5.33521
Olfr1014	7.35485	7.79945	7.16799	5.34877	6.65508	6.65508
Olfr1016	8.76802	8.7048	8.30809	6.75985	7.75934	7.63409
Olfr1018	7.05124	7.80616	7.21808	5.84659	6.18108	5.51672
Olfr1026	5.48068	5.29845	5.39997	5.67979	5.58351	5.94256
Olfr1055	5.27635	5.27635	5.40591	5.61928	5.76043	5.97267
Olfr1065	6.06385	6.38495	6.45584	7.14992	7.03299	6.68093
Olfr1099	6.68482	7.08762	7.7566	5.93504	5.75726	5.00708
Olfr11	7.12066	7.18656	6.99204	5.80746	6.74151	5.95774
Olfr1102	6.82278	6.66768	7.16362	7.97157	7.65347	7.80738
Olfr1104	7.14651	7.4813	7.78062	6.53946	6.80212	6.91005
Olfr111	6.41103	6.6519	6.34187	6.06975	6.0221	5.56046
Olfr1110	6.97273	7.05437	7.15271	5.35392	6.19217	4.82125
Olfr1112	5.97561	6.18142	6.77703	4.9556	5.70975	4.81629
Olfr1116	4.12235	4.72943	4.55145	2.95218	3.72322	3.27834
Olfr1120	6.15744	6.64249	6.25252	5.08234	5.45194	5.2273
Olfr1123	7.00927	7.49696	7.45282	5.90911	6.60518	5.78095
Olfr1134	6.75567	7.07646	6.77178	6.18663	6.40196	6.55694
Olfr1140	7.36175	7.76091	7.44917	7.19158	7.1072	6.75389
Olfr1143	6.26306	7.00399	6.37644	5.49488	5.84968	6.05173
Olfr115	8.42527	8.48834	7.75503	7.22788	7.88732	7.17709
Olfr116	9.01287	9.32849	8.68836	6.67436	7.93407	6.85014
Olfr1168	7.77062	8.08697	8.2238	7.13064	7.72112	7.54338
Olfr117	5.18556	5.233	5.61718	4.43339	4.67448	4.18793
Olfr1219	6.6476	6.34139	6.64632	5.74062	6.16798	5.66524
Olfr1222	7.42581	7.74598	7.41318	6.75715	6.93819	6.80947
Olfr1240	6.1292	6.31282	6.5993	5.35161	5.82469	5.62619
Olfr125	5.92825	6.05291	5.81856	3.99961	5.07657	4.35153
Olfr1251	4.93547	4.91802	4.82429	4.28209	4.09661	3.61161
Olfr1253	6.47608	6.66353	6.04666	4.28209	4.79549	4.79429
Olfr1258	6.04932	6.6519	6.29511	5.50535	5.81364	5.63109
Olfr1269	5.94728	6.15135	6.09521	5.008	5.63359	5.23301
Olfr1274-ps	7.89936	8.22866	7.48653	6.66185	7.19576	7.14238
Olfr1286	5.52922	5.4205	5.952	4.76138	4.93625	4.82086
Olfr1295	6.19864	6.04645	5.8166	4.60121	4.42001	4.39355
Olfr1297	7.0868	7.50571	7.12559	5.79035	6.21253	5.5019
Olfr1299	7.3834	7.59662	7.2143	6.51907	6.88039	6.02209
Olfr130	6.32018	6.57154	6.55018	5.425	5.59506	5.13487
Olfr1301	7.25176	7.55547	7.65193	5.88883	6.35539	5.62795
Olfr1314	5.35801	5.17517	5.76429	4.55595	4.67448	4.08714
Olfr1320	5.82219	6.32374	5.90162	5.15449	5.20941	4.8024
Olfr1342	6.27526	5.64246	6.38326	5.02871	5.20015	4.85759
Olfr1347	6.52043	6.50302	6.75906	5.89221	5.8996	6.21075
Olfr1349	6.40675	6.49644	6.78987	5.84774	5.77996	5.84774
Olfr1350	6.19748	6.98872	6.58835	5.97461	5.78401	5.53877
Olfr1352	8.03541	8.11908	7.92718	5.98311	6.82082	6.02982
Olfr136	7.20231	6.92856	6.73564	5.57662	6.32934	5.25966
Olfr137	6.86169	6.7579	6.76251	5.69332	5.95365	5.93174
Olfr1370	7.69226	7.56253	7.36149	6.51803	6.52187	5.87111
Olfr138	5.59315	5.97167	5.99003	4.59611	4.98244	4.19525
Olfr1383	6.78867	7.18143	7.39363	6.18341	6.61999	6.34934
Olfr1387	6.30587	6.61315	6.64525	5.64095	6.18108	5.57882
Olfr1395	7.41539	7.60213	7.43966	6.89144	6.94836	6.87616
Olfr1396	6.83176	6.92506	6.84466	5.93598	6.38556	6.13114
Olfr1420	6.16417	6.47459	6.51495	5.40086	5.78966	5.40095
Olfr1423	6.41279	7.08868	7.35428	6.05046	5.91913	5.87465
Olfr1426	6.96326	7.03436	7.23867	5.86257	5.98693	6.04305
Olfr1427	6.58747	7.03176	7.43469	5.78195	6.0789	5.76946
Olfr1428	6.60905	6.65977	7.01015	6.20301	6.34404	5.53052
Olfr1436	7.45438	7.64291	7.08964	6.64842	6.99245	6.62544
Olfr1446	6.6463	7.06119	6.31748	5.55948	5.90822	5.80314
Olfr1447	7.08755	7.63429	7.05715	6.50255	6.89334	6.6919
Olfr1459	6.24933	5.98125	5.6599	4.74834	5.16925	5.27057
Olfr1463	8.59386	8.59885	8.35115	6.80519	7.91337	6.97293
Olfr1471	6.65349	6.93831	6.57301	5.53907	5.95427	5.95427
Olfr1477	7.16075	7.23631	7.05144	5.42221	6.60359	6.14185
Olfr1484	6.98658	6.82717	6.97295	5.3757	5.97615	5.32673
Olfr1487	5.14456	5.25559	4.72735	4.13816	4.27154	3.64449
Olfr1491	6.32599	6.36062	6.2477	5.59924	5.77858	5.52347
Olfr1494	5.61385	5.79183	5.7669	4.84286	4.90687	4.26154
Olfr15	7.03346	7.72378	7.48134	5.9875	5.9875	4.86307
Olfr1501	5.58644	5.9709	5.90468	4.35891	5.09054	4.60121
Olfr1512	7.16377	6.86612	7.47239	7.9744	7.82215	7.80092
Olfr1532-ps1	7.06939	7.31305	7.50148	6.27347	6.67889	6.35479
Olfr1537	7.77134	8.1541	7.59308	6.9152	7.29049	6.47314
Olfr165	6.16738	6.39496	5.93082	5.19983	5.52894	5.62864
Olfr17	7.54868	7.66299	7.38655	5.72554	6.25799	5.62546
Olfr173	6.67317	7.66299	6.93515	6.28177	6.54464	5.95321
Olfr177	5.56712	5.73103	5.69175	4.30201	5.12971	4.71611
Olfr197	7.33869	7.45398	6.85286	5.56162	6.16844	5.85484
Olfr202	7.00203	6.96589	6.90355	5.6599	6.26457	6.26194
Olfr204	5.19266	5.47723	5.51072	4.60674	4.79413	4.44283
Olfr206	4.26455	4.48704	3.72226	3.08701	3.28802	3.15305
Olfr215	6.56304	6.37667	6.44811	5.7753	6.03838	5.60458
Olfr220	6.60727	6.90478	6.91545	6.479	6.22562	5.68815
Olfr222	6.50082	6.87075	6.23198	5.91371	5.7668	5.7838
Olfr239	8.36961	8.65614	8.34841	7.72796	7.82488	6.91901
Olfr284	6.57841	6.83378	6.58707	5.86083	6.24845	6.13046
Olfr290	7.33806	7.81795	7.40376	5.82411	6.59369	6.05257
Olfr291	6.69238	7.24901	7.19534	5.54515	6.00698	5.15229
Olfr295	6.6022	6.37434	6.19307	4.99318	5.5438	4.96532
Olfr297	6.82153	6.66403	6.67231	5.1928	5.57452	5.07732
Olfr307	6.15459	6.66649	6.18511	5.15649	5.5587	5.43516
Olfr309	8.72152	8.97177	8.54663	6.951	7.92449	7.45353
Olfr313	5.03051	5.5961	5.26138	5.74398	5.7398	5.71868
Olfr316	7.39635	7.49951	7.59764	6.39791	6.67614	5.91584
Olfr318	6.07873	5.99817	6.20824	5.28379	5.2062	4.89938
Olfr319	6.99723	7.23152	7.04348	6.3116	6.21762	5.73538
Olfr32	5.92521	6.0562	5.68815	5.02138	5.37168	5.02348
Olfr332	7.46147	7.98695	7.58267	6.52866	7.11249	6.82736
Olfr339	6.29203	6.54555	6.22458	4.66057	5.24	4.59937
Olfr342	6.46467	6.35872	6.53899	5.31658	5.83132	5.26936
Olfr347	6.82484	6.94325	6.97216	5.12057	6.20083	5.57988
Olfr362	7.31984	7.05891	7.05707	6.50443	6.50197	5.88853
Olfr365	8.18434	8.30241	8.31274	7.7196	7.68377	7.59766
Olfr39	7.5366	7.78647	7.48054	5.76518	6.17718	5.99874
Olfr392	6.06244	6.74897	6.41618	5.31445	5.7578	4.72076
Olfr394	6.29343	6.93151	6.29928	5.17961	5.94937	5.61497
Olfr403	6.82186	7.12046	6.88879	6.02791	6.39255	6.09804
Olfr406	7.01767	7.00591	7.30356	5.88501	6.02443	6.02443
Olfr449	8.68612	8.30316	8.01297	7.10815	7.26893	6.52195
Olfr463	6.3883	6.47982	6.35986	5.60039	5.88863	5.67798
Olfr464	7.25341	6.87958	6.71068	6.12695	6.45401	5.61442
Olfr466	4.60121	5.30741	5.30548	3.92153	4.37547	4.08219
Olfr479	6.32376	6.46843	6.15891	5.02549	5.20083	5.34472
Olfr480	4.33623	4.46507	4.24978	5.00716	4.55432	4.93107
Olfr490	4.83006	4.47886	5.13616	5.83572	5.59764	5.61088
Olfr491	6.47218	6.96378	6.74838	5.54085	6.12551	5.93435
Olfr495	6.94842	7.15411	6.48691	5.58892	6.2227	6.02886
Olfr502	6.74451	7.01533	6.86622	5.69196	6.25911	6.18044
Olfr507	5.14189	5.17404	5.3062	5.65292	5.48964	5.34375
Olfr523	6.70049	7.35171	6.91577	6.37802	6.39466	6.44335
Olfr527	7.03457	6.86927	7.10856	6.02982	6.38093	5.83172
Olfr53	6.52635	6.31194	6.85946	5.64369	5.76974	5.0789
Olfr530	6.22246	6.39782	6.29666	5.57451	5.60066	5.13508
Olfr531	7.05684	7.28058	7.57367	5.77737	6.3537	5.12245
Olfr535	7.32944	7.36346	7.69783	7.04182	7.13959	6.88926
Olfr536	8.34919	8.49647	9.04363	7.54994	7.66387	7.03195
Olfr541	7.36709	7.39015	8.05834	7.06852	7.01006	6.29472
Olfr544	5.89024	6.13018	6.64868	7.33023	6.84918	6.71791
Olfr57	6.46375	6.06938	6.7024	6.8247	7.04862	7.09629
Olfr575	5.90173	5.39181	6.14438	6.28925	6.46459	6.43371
Olfr605	5.78218	5.04076	5.503	6.31873	5.88164	6.54073
Olfr613	5.64225	5.40976	5.68815	5.96751	6.08673	6.1003
Olfr63	7.17891	7.79248	7.24866	6.56722	6.97605	6.59658
Olfr693	7.0113	6.81776	6.79012	5.8616	6.43039	6.48098
Olfr694	6.48741	6.95682	7.09628	5.72798	6.11126	6.10182
Olfr695	4.87317	4.92622	5.44819	3.5261	3.73043	3.74923
Olfr701	4.26623	4.35875	4.77976	3.3171	3.762	3.7363
Olfr703	5.68504	5.63067	5.65726	4.45449	4.52241	4.54103
Olfr704	4.65225	5.7244	6.17504	3.91941	4.56377	3.5152
Olfr705	5.86498	6.01089	6.13392	4.66762	4.67663	4.90235
Olfr706	6.78373	7.08294	7.21633	5.68504	6.3478	5.90979
Olfr715	6.18518	6.57328	5.94998	5.02237	5.48372	5.58153
Olfr723	6.17857	6.19345	6.16987	5.13261	5.45741	4.97736
Olfr730	6.11083	6.42421	6.53298	5.72499	5.63783	4.82844
Olfr733	5.6758	5.64174	5.94945	4.76341	5.05244	4.75226
Olfr734	6.39145	6.48403	5.98376	5.11101	5.31825	5.34246
Olfr736	6.27867	6.19832	6.12319	5.31555	4.81101	4.83295
Olfr769	6.16139	7.05066	6.50115	5.91236	5.83321	5.30706
Olfr776	3.59441	3.6952	4.00612	3.04578	2.8686	2.90348
Olfr786	6.31459	6.79564	6.68112	6.14707	5.49911	5.5735
Olfr788	6.70254	6.60463	6.61053	6.18409	6.18409	5.68815
Olfr796	7.21516	7.32003	7.39901	5.71349	6.29802	6.01021
Olfr801	7.47081	7.42578	7.31334	6.35485	6.60226	6.02982
Olfr820	7.30283	7.60025	7.79804	6.40737	6.59568	5.35007
Olfr843	7.3294	7.51373	6.78063	5.31642	6.35462	5.76519
Olfr845	6.34929	6.8875	6.14914	5.149	5.88315	5.74108
Olfr851	5.14043	5.34763	4.7259	3.83416	4.38067	4.38067
Olfr855	5.83052	5.91161	5.54445	4.63908	5.1928	4.96942
Olfr859	6.83009	7.38127	6.84683	6.20221	6.7274	6.35137
Olfr867	6.92287	7.0342	7.03584	5.53299	6.2654	5.92819
Olfr868	6.47892	7.17906	6.92467	4.65534	5.09569	4.76908
Olfr898	6.70488	6.80813	7.07354	5.93921	6.25792	6.23657
Olfr904	5.82762	5.63837	5.94146	6.57521	6.34056	6.52578
Olfr907	6.26132	5.79888	5.91354	5.125	5.50796	5.10095
Olfr91	7.45644	7.32787	6.9592	6.75857	6.84491	6.8324
Olfr910	7.26327	7.10507	5.9372	5.16423	4.73437	4.3921
Olfr914	6.20233	6.50331	6.50841	5.39162	5.81344	5.40553
Olfr916	3.62598	3.73003	3.75927	3.84409	4.01304	4.10377
Olfr943	6.96953	7.31722	7.17725	6.17674	6.81852	6.26268
Olfr948	7.03574	7.21607	6.86808	6.22162	6.53057	5.94292
Olfr95	6.13848	6.30837	6.2866	5.13119	5.53927	5.58391
Olfr97	6.47191	6.97087	6.56892	5.8387	6.245	5.83419
Olfr976	5.77928	5.46616	5.87427	6.4266	6.23661	5.99703
Omp	12.0805	12.2602	12.4329	11.6853	11.872	11.9064
Orm2	3.84964	3.91963	3.87554	4.2508	4.02945	4.10757
Osm	4.53192	4.46285	4.55502	4.69435	4.98759	4.75295
Osmr	6.90004	6.86664	6.69143	8.15109	8.65341	8.39233
Pah	6.00239	5.59552	5.54393	4.0384	4.19767	4.28163
Pcbd1	6.79243	6.44551	6.27308	5.89645	6.02357	5.60772
Pcdh10	6.17024	5.71755	6.54701	7.13921	7.02102	6.85007
Pck2	7.69377	7.80216	8.06127	7.40054	7.50043	7.5904
Pdcd4	9.74216	9.52886	9.56046	9.46831	8.90937	8.97613
Pde3b	5.32324	5.08994	5.31498	5.63222	5.71478	5.56521
Pde4d	4.95777	5.15241	4.43837	5.52718	5.52718	5.22218
Pde6d	11.147	11.2763	11.344	10.74	11.0111	10.788
Pdk4	6.78576	6.57036	6.54232	7.03845	7.44665	7.3767
Penk	6.13156	6.46981	6.35265	6.87263	6.93936	7.64468
Pim1	6.84391	6.62999	6.79809	7.19939	7.66799	7.41488
Pip5k1b	6.17097	5.9286	6.07388	6.79765	6.50843	6.37428
Plaur	5.48743	5.52014	5.3279	5.6345	5.9065	5.76435
Plekhs1	6.46071	6.06816	5.75794	7.77209	9.29222	6.95895
Plk3	5.92479	5.90223	5.6307	6.33715	6.54364	6.39129
Plscr1	8.52158	8.08459	7.42177	8.90146	9.13375	9.07602
Polr2j	8.84654	8.85437	8.79391	8.43662	8.28811	8.39435
Ppp3cc	8.1228	8.21951	8.19094	7.97378	7.80312	7.88002
Prss8	8.94297	8.62044	8.75304	8.51344	8.51212	8.26283
Prtn3	7.4352	6.6761	6.37503	6.04532	5.74588	5.84139
Pstpip2	6.74535	6.42818	6.51337	7.26571	7.23089	7.23906
Ptafr	5.78964	5.69124	5.62808	6.34171	6.08906	6.62176
Ptgs2	6.42522	6.13136	6.19327	7.24286	7.89476	7.52363
Ptp4a3	9.27975	9.45388	9.7447	8.89926	9.0752	9.10766
Pvr	6.59548	6.24748	6.69663	7.4167	7.42171	7.17844
Qsox1	8.84399	8.40309	8.86201	9.82522	9.2931	9.69895
Rbbp4	9.18698	9.39268	9.18448	8.89469	8.99359	8.937
Rbbp9	8.37125	8.44804	8.24239	8.18302	7.79845	7.90974
Rbm25	6.57328	7.11309	7.06463	7.54863	7.67374	7.59106
Rbm43	7.7935	7.53065	7.58846	7.16423	7.38835	7.37989
Rbmy	3.20016	3.35877	3.26512	3.65975	4.49856	4.31609
Rbp4	8.1516	7.89909	7.67422	5.99678	6.11904	6.38
Rgs1	3.81286	3.84978	3.68322	4.13488	4.06555	4.68188
Rhoc	8.89459	8.94578	8.70424	8.21806	8.40823	8.27059
Rida	7.16402	6.74498	6.78709	6.17762	6.46014	6.46014
Rnf167	8.87935	8.98141	8.99817	8.66551	8.60058	8.68563
Rnf19b	5.95686	6.18809	5.99485	6.77853	7.29169	6.96521
Rnu3a	5.16753	5.41164	5.322	6.40169	6.5857	6.63859
Rnu73b	5.6357	6.90074	6.86658	8.44209	7.57997	7.72212
Rpl13a	10.44	10.2257	10.2307	9.77012	9.91538	9.81905
Rpl18	10.5991	10.3226	10.6942	10.1564	10.0334	10.0489
Rpl38	10.6026	10.4214	10.3248	10.1206	9.75005	9.87601
Rps19	9.24159	8.88639	8.74639	8.21763	8.26594	8.49505
Rps27a	7.68763	7.54464	7.63348	7.18926	7.41078	7.29818
Rsph14	7.90069	7.29557	7.48821	7.10405	7.13768	6.88404
Rtp1	10.317	10.6025	10.7306	9.7759	10.1387	10.1238
S100a6	7.72701	7.61345	7.14322	8.3364	7.96526	8.49686
S100z	5.46837	5.17478	5.81066	5.79333	6.09118	6.20117
Sat1	7.90272	7.41914	7.21233	8.18051	8.52821	8.37698
Sbno2	6.8415	6.9765	7.07057	7.92399	8.67762	8.0844
Scarna13	7.46087	7.70544	7.25229	8.07276	8.14751	8.41634
Scrn3	7.76601	7.72208	7.45946	7.10971	7.19093	7.32305
Sele	5.83757	5.72504	5.63536	6.21639	7.59549	6.49268
Selp	6.09066	5.68419	5.4899	6.66282	8.45214	6.86402
Serpina3f	5.12912	4.7142	4.53556	5.92349	5.54929	6.74901
Serpina3n	11.5751	11.1816	10.8708	12.4268	11.8693	12.6769
Serpinc1	6.02143	5.80764	5.54907	4.75367	5.05087	4.8602
Sfrp4	7.2235	7.48111	6.94023	8.16989	7.99814	8.52521
Sh3bp2	5.80092	5.49702	5.78103	6.00992	6.16626	6.1708
Shank2	8.58477	8.86691	8.78055	8.29657	8.40512	8.23955
Slc15a3	6.04932	5.80302	5.82702	6.06878	6.51257	6.67826
Slc16a11	8.23996	8.52917	8.37432	8.05838	8.13188	7.97912
Slc20a1	8.36154	8.44347	8.14881	9.02402	9.3097	8.7969
Slc24a4	9.8349	9.99923	10.1169	9.63101	9.67884	9.6608
Slc26a1	6.63244	6.51337	6.54235	7.44197	7.82006	7.18331
Slc28a3	6.39465	6.59886	6.03903	7.24047	7.68857	6.78431
Slc38a1	5.00059	4.6483	5.04629	5.63631	5.21597	5.53265
Slc38a3	6.21298	6.21601	5.969	5.43795	5.25586	5.61768
Slc38a4	5.56998	5.28225	5.34999	3.9845	4.40318	4.40318
Slc6a14	6.87314	6.33062	6.33229	7.5649	8.28641	7.82529
Slc7a11	7.41599	6.97598	6.72342	8.26647	8.59423	8.09377
Slf1	5.3389	5.57121	5.57238	5.85596	5.85453	5.68583
Smurf2	4.92543	4.86732	4.87884	5.46759	5.11343	5.27435
Snap25	9.98972	9.79313	10.014	9.54465	9.54465	9.29781
Snca	9.62376	9.24966	9.54845	8.90523	9.04174	9.05916
Snora16a	7.96431	7.83214	7.67005	9.0075	8.99408	9.15162
Snora24	5.15283	5.58864	5.27567	5.99337	6.19709	6.05173
Snora31	5.76451	6.20506	6.08123	7.38533	7.22154	7.0202
Snora33	6.1985	6.75741	6.62688	7.0897	7.79876	7.84688
Snora44	7.06473	7.69231	7.38244	9.4002	9.41057	9.45547
Snora70	6.66001	6.66171	6.51557	7.05574	7.31895	7.21228
Snord104	10.5457	10.9944	10.7519	11.4994	11.7999	11.4841
Snord118	8.54283	9.03664	8.58216	10.3495	10.3324	10.48
Snord14d	6.91359	7.27977	7.32851	7.93992	8.05753	7.85429
Snord15a	5.44843	5.81486	5.88403	6.06535	6.33595	6.6772
Snord22	5.38894	5.40071	5.40071	5.59506	5.74946	5.79664
Snord87	4.22915	4.69944	4.91293	5.41016	5.60041	5.31423
Soat2	4.8064	4.8064	4.76889	4.91333	5.11755	5.05494
Socs3	7.00481	7.0626	6.76499	7.61159	8.67394	7.85757
Sox11	6.22156	6.23449	6.05261	7.61856	7.32935	7.23134
Sprr2a2	8.46826	7.98687	7.16676	11.5744	9.72428	12.0767
Sprr2a3	7.42021	6.46208	5.76856	10.2297	7.85161	10.629
Srsf10	5.52316	5.52126	5.46814	6.00605	5.74336	5.71375
Srsy	3.35022	3.2816	3.20152	3.4644	3.81551	4.01331
Steap2	7.40164	7.61041	7.65068	8.45899	8.39297	8.26617
Steap4	8.37614	7.96802	7.56435	9.249	9.8561	9.04626
Stk32a	6.55842	6.62803	7.03395	7.32895	7.49725	7.437
Stmn1	8.81648	8.8849	8.88997	10.0968	9.88594	9.74399
Sumo1	6.56919	6.13154	6.02789	7.38757	7.06214	6.89491
Syngap1	7.27261	7.16488	7.69341	6.89772	6.89322	6.89611
Tac1	4.25948	4.63539	4.8525	5.11747	5.43166	5.57179
Tac4	8.65651	8.48682	8.38773	8.14456	8.02866	8.06986
Tbr1	4.64872	4.73145	4.59256	4.86267	5.03097	4.85759
Tdo2	4.44362	4.31492	4.55473	3.39072	3.39721	3.43507
Timp1	6.47218	6.33595	5.85952	7.2707	7.28375	7.81887
Timp3	8.74748	8.93861	8.94375	9.45416	9.65442	9.68719
Tlr4	5.98194	5.7367	5.30483	6.30704	6.12641	6.12078
Tm4sf4	6.34207	5.76216	5.70954	5.08723	4.92086	5.0922
Tmed5	5.74562	5.74953	5.56379	6.15882	6.08977	5.99218
Tmem109	7.7791	7.78235	7.69603	7.47846	7.47846	7.16975
Tmem150c	8.27759	8.35174	8.49408	7.98155	8.02085	7.93338
Tmem173	7.57986	7.09184	6.89977	8.26024	8.23671	8.29344
Tmem220	7.02108	6.75445	6.73272	6.3046	6.43072	6.20831
Tmem223	9.45549	9.53533	9.59277	9.35348	9.1281	9.27096
Tmem251	5.0529	4.77776	4.96344	5.41148	5.13451	5.34045
Tmem38b	4.53466	4.93701	4.78342	5.31317	5.29322	4.93701
Tnfaip2	7.03993	7.17325	6.89047	7.95705	9.77298	8.41878
Tnfaip3	6.15633	5.98226	6.08445	6.63032	7.65318	7.21192
Tnfrsf11b	6.00507	5.78931	6.10006	6.43246	6.43246	6.52778
Tnip3	4.30621	4.15683	4.16331	5.27298	6.02106	5.50313
Tpsab1	5.22908	4.93147	5.15713	6.20366	5.39683	6.24075
Trdn	5.97823	5.97778	5.84188	5.44108	5.1887	4.91014
Trem1	4.894	4.89604	4.81187	5.38609	5.90871	5.52653
Trmt2b	7.46037	7.46037	7.67489	7.26347	7.30801	6.95461
Tsr2	7.87652	7.56895	7.80767	7.4119	7.45122	7.40848
Tst	9.48792	9.50054	9.26783	8.94358	8.78314	8.81467
Ttc25	8.28697	8.2597	8.29106	7.76763	8.05245	8.05245
Ttc8	8.4752	8.48636	8.55427	8.17964	8.23485	8.14349
Ttll1	8.34515	8.33437	8.36368	8.00793	7.93786	8.01492
Ttr	7.08886	6.82674	6.7908	5.63003	5.24742	5.95304
Tubb2a	7.03939	6.79688	7.10592	7.75646	7.95416	7.58727
Tubb2a-ps2	6.29561	6.0757	6.38891	7.30279	7.38423	6.9511
Tubb2b	7.63363	7.42384	7.85039	8.8471	8.71934	8.38282
Tusc5	8.17283	8.2986	8.45931	7.54737	7.88654	7.97739
Ucma	5.75004	5.73103	5.30901	8.46037	6.69476	8.49267
Usp1	6.07094	6.46126	6.53123	6.99496	6.91088	6.7998
Usp37	5.65597	5.8589	6.0898	6.31549	6.26991	6.23188
Usp46	8.53137	8.30541	8.39436	8.19804	8.06416	8.03139
Uty	3.43933	3.31362	3.55035	7.63003	7.29914	7.06111
Vav1	5.85157	5.79292	5.33796	6.50906	6.07988	6.46601
Vcam1	6.46481	6.04738	6.12352	6.84311	7.26789	6.61878
Vsnl1	9.73322	9.82068	9.9917	9.33588	9.56098	9.57199
Vta1	8.07034	7.79108	7.84473	7.68773	7.48457	7.53319
Vtn	6.3951	6.15704	5.96305	4.84601	5.23414	5.23477
Vwa3a	9.64431	9.5716	9.93075	9.3008	9.45511	9.2757
Vwa3b	7.59446	7.45166	7.48197	7.07068	7.24585	7.09133
Wdr17	8.56183	8.64938	8.71607	8.04616	8.42131	8.37729
Wdr19	7.9857	8.0876	8.1024	7.7873	7.7603	7.63121
Wdr31	8.06436	7.93729	8.13993	7.79336	7.76983	7.6858
Wdr34	8.40448	8.07638	8.23191	7.89551	7.86191	7.89623
Wdr38	7.9458	8.06671	7.90562	7.38282	7.52836	7.52836
Wdr54	8.38276	8.32656	8.55927	7.84203	7.91865	7.91865
Wdr63	8.25193	8.33757	8.35364	8.01663	8.12003	7.68105
Xist	10.6247	10.6981	11.113	4.35955	4.29167	4.22097
Zc3h12a	5.78518	5.49781	5.69756	6.64551	7.18888	6.63909
Zfand2a	10.6876	10.6849	10.7951	10.3631	10.4028	10.1965
Zfp322a	5.51974	5.46502	5.55494	5.88344	5.79995	5.82363
Zfp36	6.19236	6.24498	6.18098	7.18685	7.6856	6.80601
Zfp607a	4.96336	5.24801	5.04214	5.37105	5.34693	5.58135
Zfp691	7.49519	7.6125	7.60263	7.3003	7.24047	7.24047
